# Supplementary material for: Controlling uni-directional wetting via surface chemistry and morphology
Source: Royal Society of Chemistry journal article supplement (doi:10.1039/c2sm26619a), 2012-01-01
Supplement: c2sm26619a.pdf [file c2sm26619a.pdf]

# ELECTRONIC SUPPLEMENTARY INFORMATION

## Controlling Uni-directional Wetting via Surface Chemistry and Morphology

**Levent Kubus<sup>1,2</sup>, Hakan Erdogan<sup>1</sup>, Erhan Piskin<sup>2,3</sup>, Gokhan Demirel<sup>1,3\*</sup>**

<sup>1</sup>*Bio-inspired Materials Research Laboratory (BIMREL), Department of Chemistry, Gazi University, 06500, Ankara, TURKEY*

<sup>2</sup>*Department of Chemical Engineering, Hacettepe University, 06532 Ankara, Turkey*

<sup>3</sup>*Biyomedtek: Center for Bioengineering, 06532, Ankara, TURKEY*

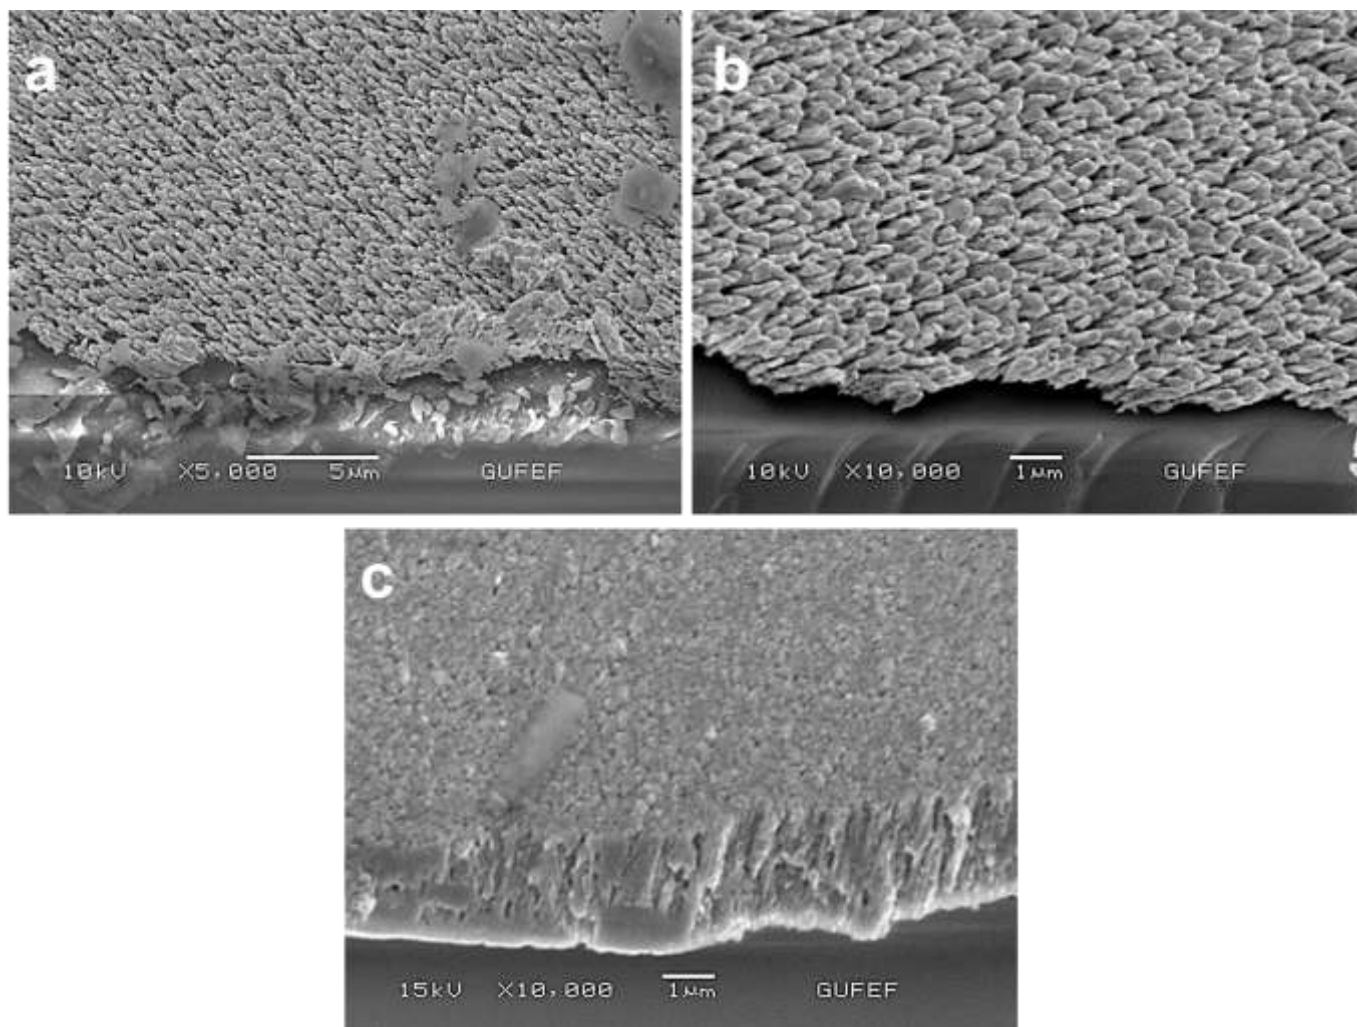

**Figure S1.** The cross-section SEM images of gold nanofilms (a) for  $\alpha=5^\circ$ , (b) for  $\alpha=10^\circ$ , and (c) for  $\alpha=20^\circ$ , respectively.

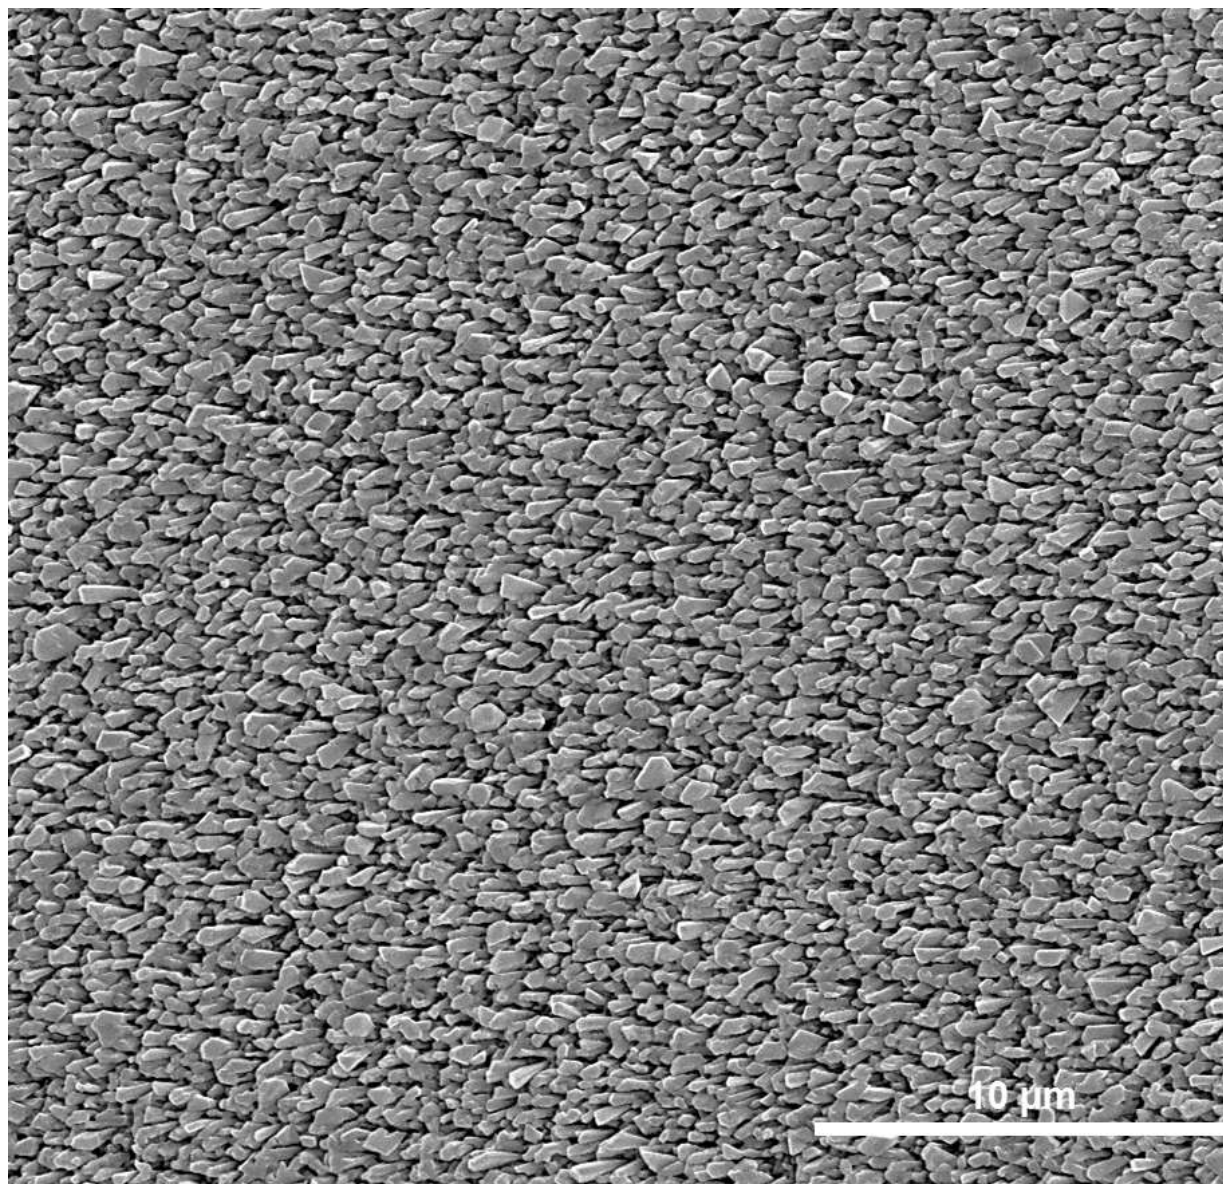

**Figure S2.** Top-view SEM image of fabricated gold nanofilm at  $\alpha=5^\circ$ .



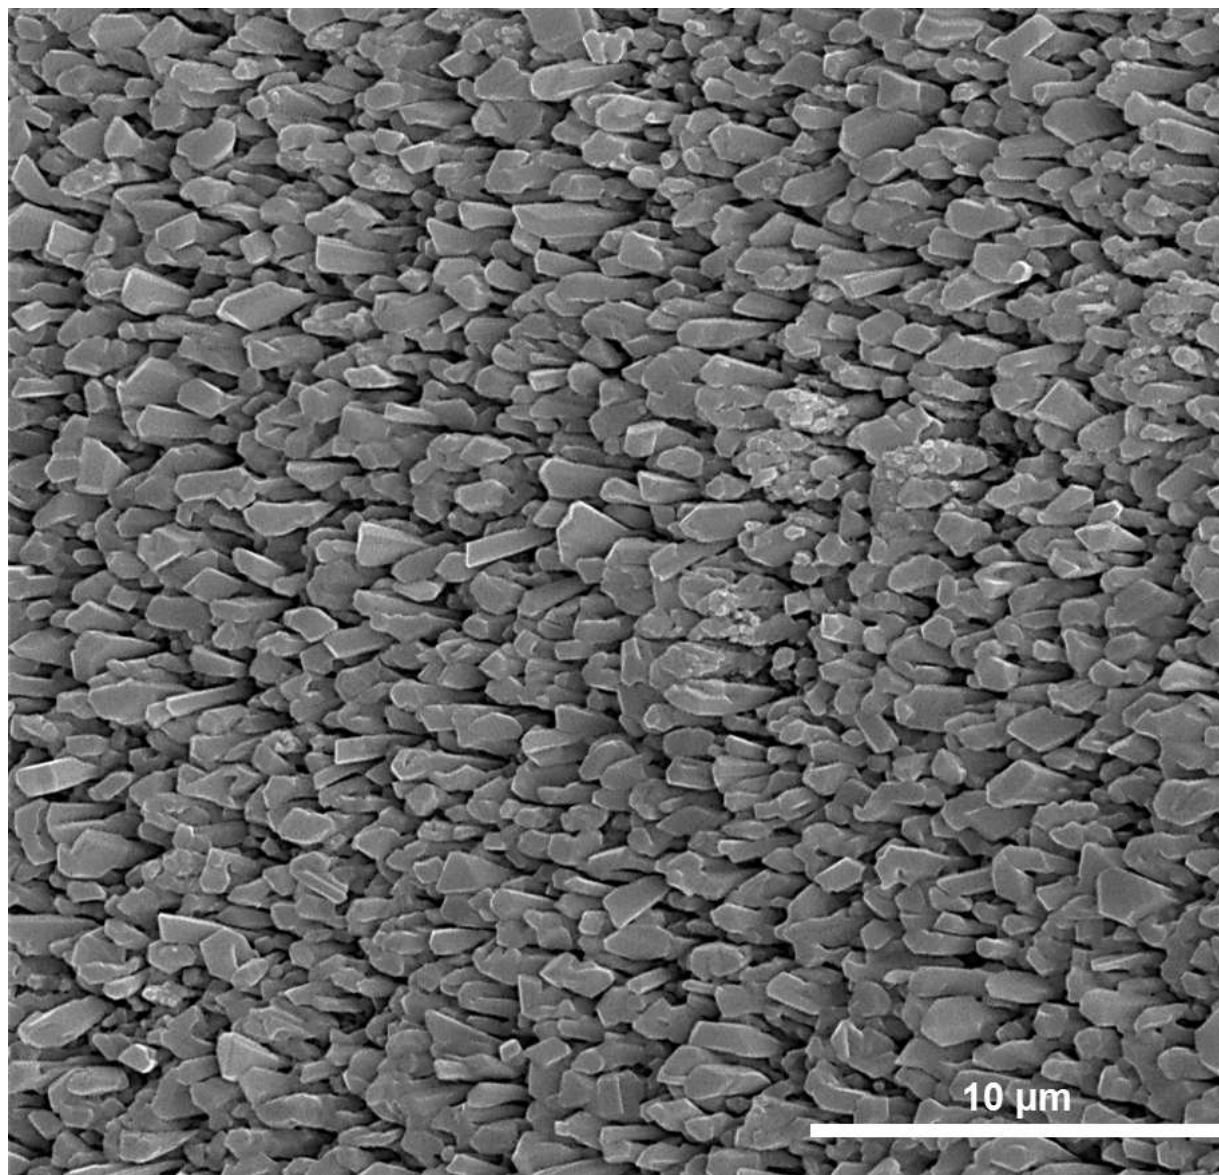

**Figure S3.** Top-view SEM image of fabricated gold nanofilm at  $\alpha=10^\circ$ .

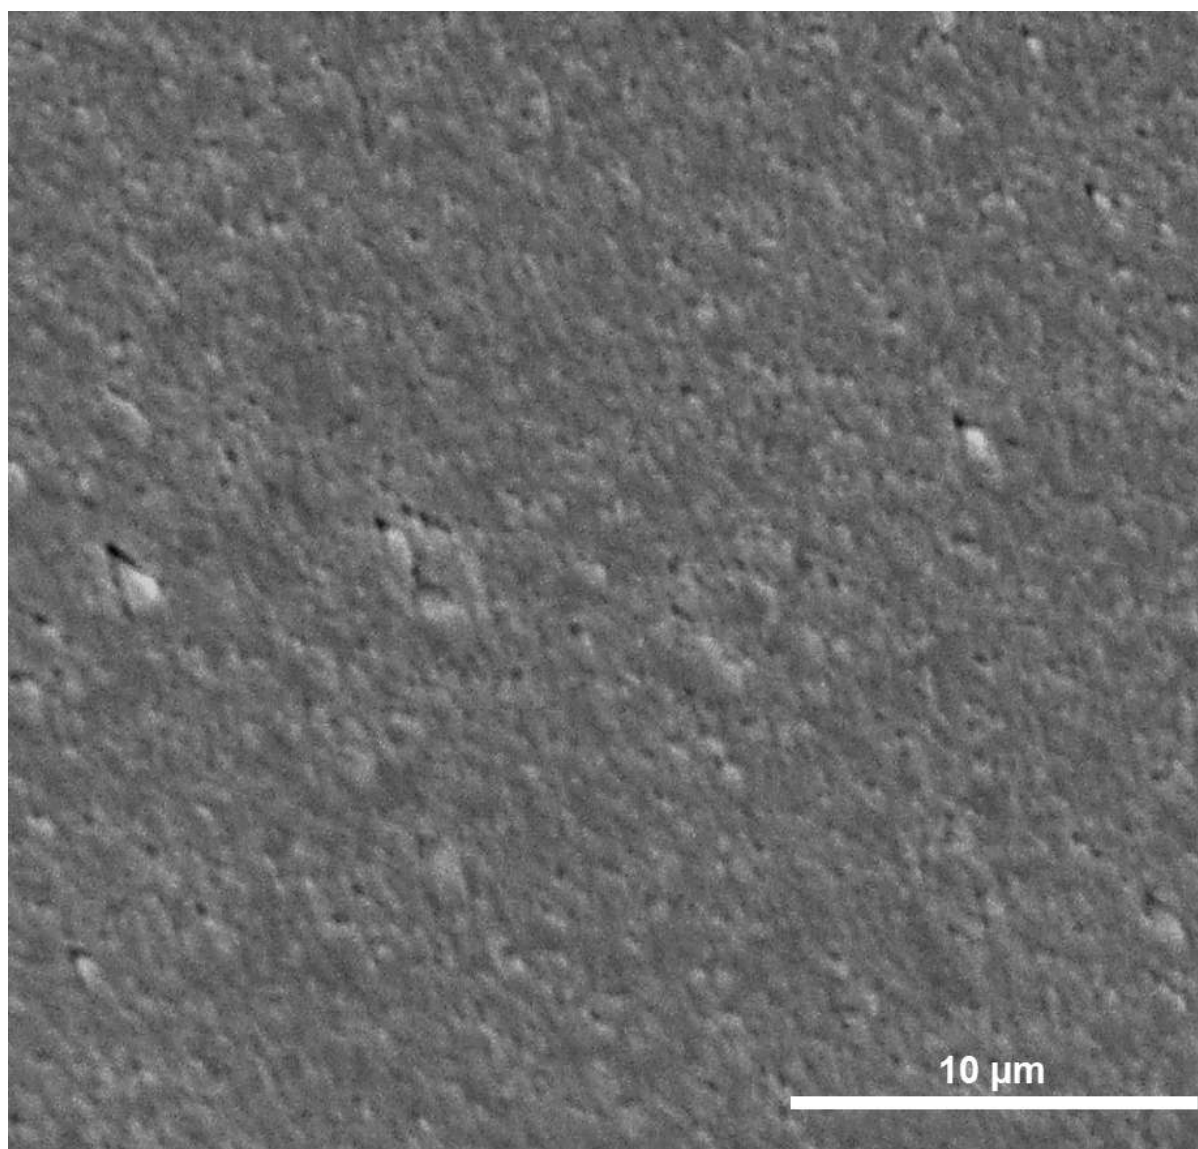

**Figure S4.** Top-view SEM image of fabricated gold nanofilm at  $\alpha=20^\circ$ .

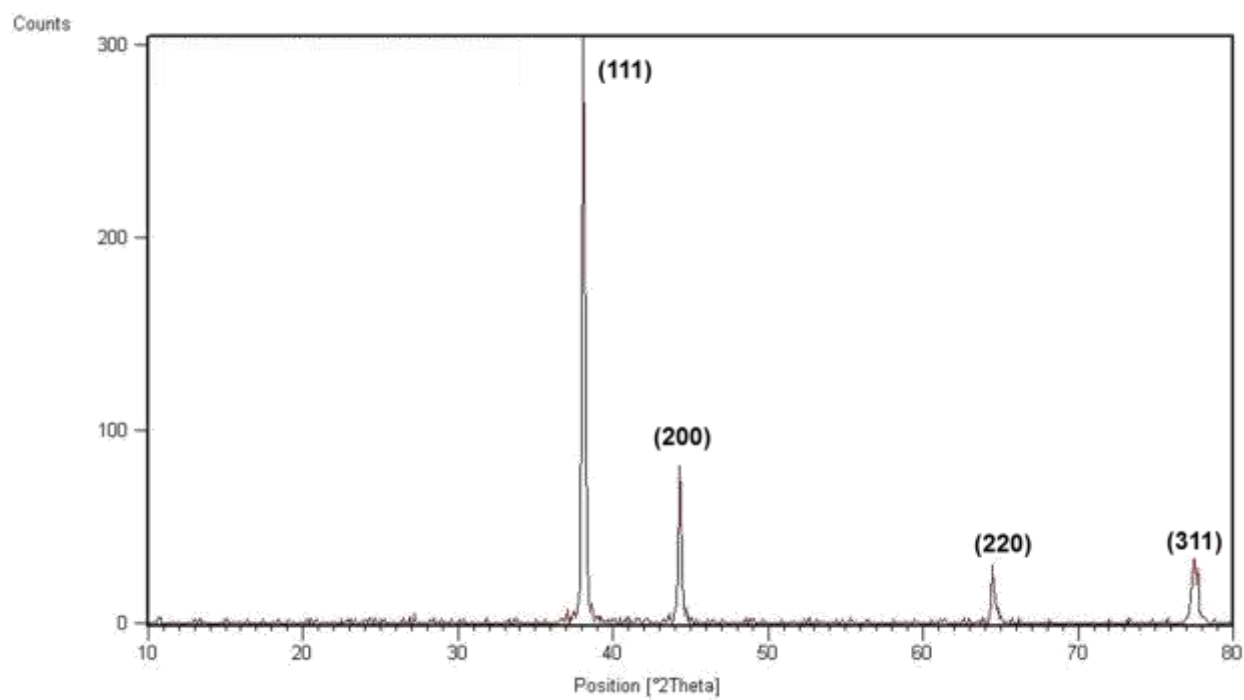

**Figure S5.** XRD pattern of fabricated directional gold nanofilm.

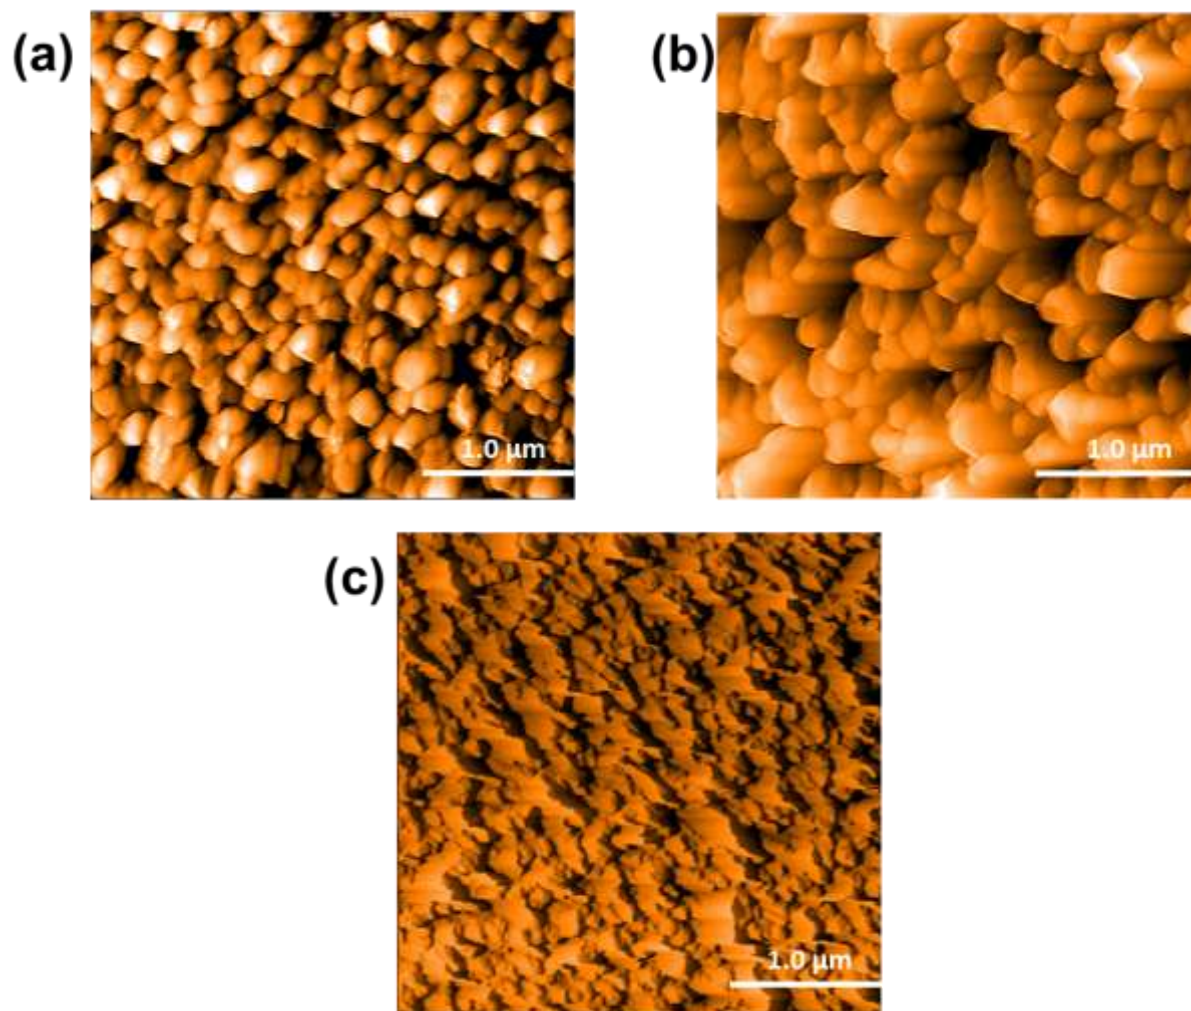

**Figure S6.** AFM images of fabricated gold nanofilms at (a)  $\alpha=5^\circ$ , (b)  $\alpha=10^\circ$ , and (c)  $\alpha=20^\circ$ .



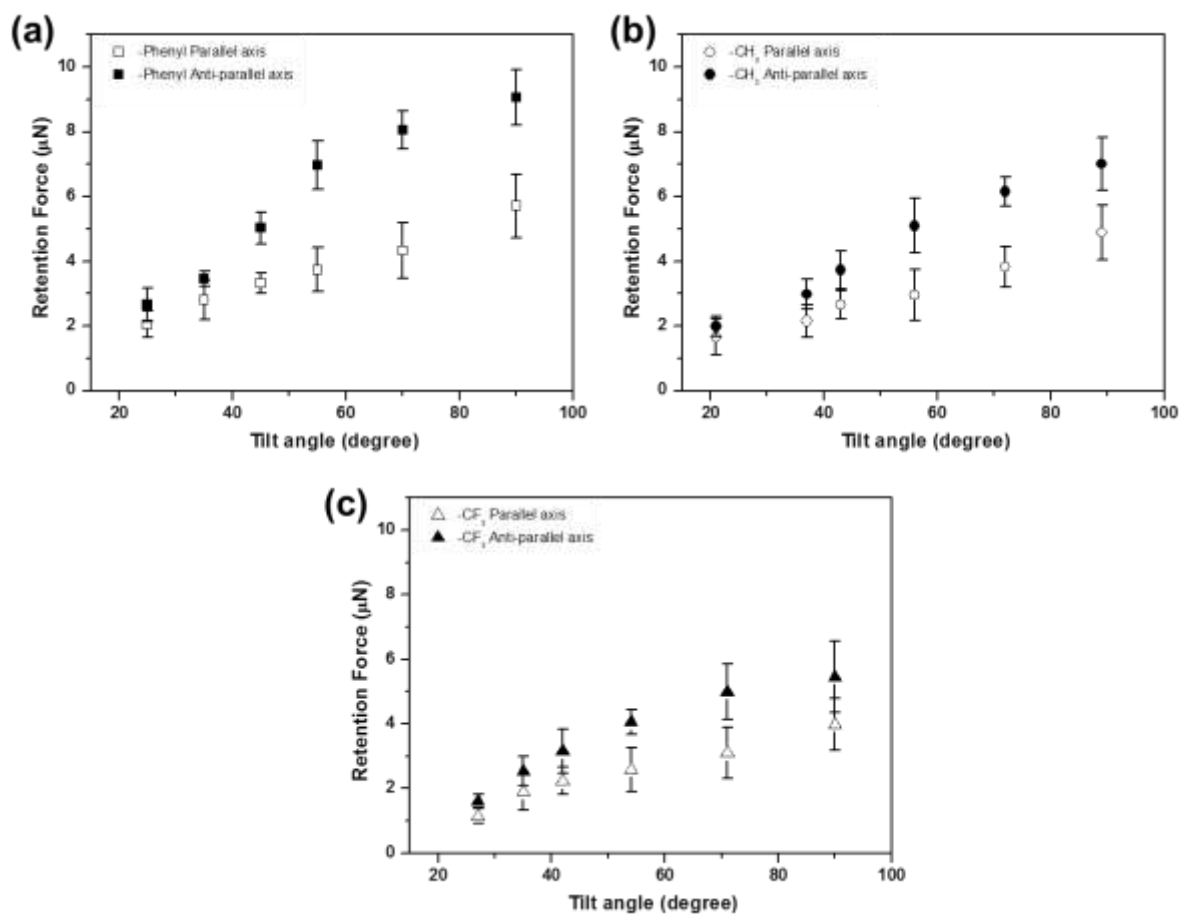

**Figure S7.** Retention Forces of modified AuNRs as a function of the substrate tilt angles.
